# Supplementary material for: Cortical Development in Typically Developing Children With Symptoms of Hyperactivity and Impulsivity: Support for a Dimensional View of Attention Deficit Hyperactivity Disorder
Source: Atypon-hosted journal article supplement (doi:10.1176/appi.ajp.2010.10030385), 2010-12-15
Supplement: ajp_168_02_143_01.pdf [file ajp_168_02_143_01.pdf]

Supplementary Table 1. Details of participants. Typically developing subjects are grouped on the basis of Conners' hyperactive/impulsive symptom scores.

|                               |                         | Number of subjects | Males-number | Conners' hyperactivity-impulsivity score | SES - mean | SES-SD | Ethnicity |                  |       |
|-------------------------------|-------------------------|--------------------|--------------|------------------------------------------|------------|--------|-----------|------------------|-------|
|                               |                         |                    |              |                                          |            |        | White     | African American | Other |
| Typically developing subjects | No symptoms             | 70                 | 40           | 0                                        | 41         | 19     | 58        | 7                | 5     |
|                               | Minimal symptomatology  | 86                 | 86           | 1-2                                      | 40         | 20     | 73        | 11               | 2     |
|                               | Moderate symptomatology | 37                 | 37           | 3-6                                      | 39         | 17     | 26        | 7                | 4     |
| ADHD                          |                         | 197                | 120          |                                          | 45         | 20     | 159       | 24               | 14    |

\*SES= socioeconomic data was derived from the Hollinghead Scales and was available on 360 subjects and did not differ between groups  $F(3,357)=1.8, p=0.14$ . There was no significant difference in the proportions of males between the groups ( $\chi(3)^2=2.45, p=0.48$ ), in the proportion of White subjects ( $\chi(6)^2=5.8, p=0.44$ ).
