# Supplementary material for: Cortical Development in Typically Developing Children With Symptoms of Hyperactivity and Impulsivity: Support for a Dimensional View of Attention Deficit Hyperactivity Disorder
Source: Atypon-hosted journal article supplement (doi:10.1176/appi.ajp.2010.10030385), 2010-12-15
Supplement: ajp_168_02_143_02.pdf [file ajp_168_02_143_02.pdf]

Supplementary Table 2.

(A) Mean age (and standard deviation) of the typically developing and ADHD groups at each wave of scan acquisition.

|        | Typically developing |            | ADHD |            |
|--------|----------------------|------------|------|------------|
|        | N                    | Mean (SD)  | N    | Mean (SD)  |
| Wave 1 | 193                  | 11.8 (2.6) | 197  | 10.6 (2.9) |
| Wave 2 | 112                  | 14.6 (2.9) | 88   | 13.7 (3.1) |
| Wave 3 | 52                   | 16.8 (2.8) | 42   | 15.9 (2.6) |
| Wave 4 | 32                   | 18.1 (2.3) | 10   | 17.6 (2.3) |

(B) Number of magnetic resonance scans at each age for the typically developing and ADHD groups

| Age (in years) | Typically developing | ADHD |
|----------------|----------------------|------|
| 8              | 32                   | 56   |
| 9              | 25                   | 36   |
| 10             | 40                   | 34   |
| 11             | 42                   | 28   |
| 12             | 38                   | 29   |
| 13             | 37                   | 23   |
| 14             | 31                   | 27   |
| 15             | 29                   | 22   |
| 16             | 32                   | 17   |
| 17             | 21                   | 18   |
| 18             | 22                   | 12   |
| 19             | 16                   | 18   |
| 20             | 24                   | 17   |
